# Supplementary material
Source: publisher figshare collection journal article supplement (https://karger.figshare.com/ndownloader/files/25209437)
Supplement: Supplementary file 1 [file 25209437]

**Appendix 2. Equations for calculating the predicted probability of hidradenitis suppurativa using the full and simplified diagnosis prediction models**

**Full Model*:**

where

and covariates other than age and BMI take the value 1 when present and 0 when absent.

*For unrounded model intercept and coefficients, see Supplementary Table 2 on page 4.

**Simplified Model*:**

where

and covariates other than age and BMI take the value 1 when present and 0 when absent.

*For unrounded model intercept and coefficients, see Supplementary Table 2 on page 4.
